# Supplementary material for: Gene expression of Tasmanian devil facial tumors differs among host populations
Source: Research Square preprint supplement (doi:10.21203/rs.3.rs-228370/v1), 2021-03-10
Supplement: Supplementary file 1 [file f9b3c4438a83f08364676319.xlsx]

## Sheet: DFTD-vs-Lip_Down
Analysis Type:	PANTHER Overrepresentation Test (Released 20200407)
Annotation Version and Release Date:	PANTHER version 15.0 Released 2020-02-14
Analyzed List:	downGeneList.txt (Homo sapiens)
Reference List:	allGeneList.txt (Homo sapiens)
Test Type:	FISHER
Correction:	FDR
PANTHER GO-Slim Biological Process	allGeneList.txt - REFLIST (9782)	downGeneList.txt (1259)	downGeneList.txt (expected)	downGeneList.txt (over/under)	downGeneList.txt (fold Enrichment)	downGeneList.txt (raw P-value)	downGeneList.txt (FDR)
cardiac muscle cell differentiation (GO:0055007)	7	7	0.9	+	7.77	0.000409	0.00723
muscle fiber development (GO:0048747)	12	11	1.54	+	7.12	1.49e-05	0.000452
cardiac muscle tissue development (GO:0048738)	9	7	1.16	+	6.04	0.00111	0.0159
striated muscle cell development (GO:0055002)	26	20	3.35	+	5.98	3.59e-08	3.48e-06
cellular component assembly involved in morphogenesis (GO:0010927)	21	16	2.7	+	5.92	9.25e-07	4.47e-05
myofibril assembly (GO:0030239)	21	16	2.7	+	5.92	9.25e-07	4.37e-05
isoprenoid metabolic process (GO:0006720)	8	6	1.03	+	5.83	0.0029	0.0366
sarcomere organization (GO:0045214)	8	6	1.03	+	5.83	0.0029	0.0363
muscle organ development (GO:0007517)	11	8	1.42	+	5.65	0.000664	0.0105
striated muscle cell differentiation (GO:0051146)	28	20	3.6	+	5.55	8.56e-08	6e-06
muscle cell development (GO:0055001)	28	20	3.6	+	5.55	8.56e-08	5.8e-06
striated muscle tissue development (GO:0014706)	17	11	2.19	+	5.03	0.000138	0.00314
muscle cell differentiation (GO:0042692)	33	20	4.25	+	4.71	5.9e-07	3.15e-05
muscle tissue development (GO:0060537)	20	12	2.57	+	4.66	0.000117	0.00275
cardiac muscle contraction (GO:0060048)	12	7	1.54	+	4.53	0.0036	0.041
muscle structure development (GO:0061061)	40	23	5.15	+	4.47	1.73e-07	1.1e-05
very long-chain fatty acid metabolic process (GO:0000038)	14	8	1.8	+	4.44	0.00205	0.0276
striated muscle contraction (GO:0006941)	19	10	2.45	+	4.09	0.000933	0.0144
muscle system process (GO:0003012)	35	18	4.5	+	4	1.21e-05	0.000391
muscle contraction (GO:0006936)	35	18	4.5	+	4	1.21e-05	0.000385
actomyosin structure organization (GO:0031032)	42	19	5.41	+	3.51	2.84e-05	0.000813
blood circulation (GO:0008015)	25	11	3.22	+	3.42	0.00163	0.0227
circulatory system process (GO:0003013)	25	11	3.22	+	3.42	0.00163	0.0225
fatty acid biosynthetic process (GO:0006633)	24	10	3.09	+	3.24	0.00359	0.0412
heart development (GO:0007507)	30	12	3.86	+	3.11	0.00194	0.0262
monocarboxylic acid biosynthetic process (GO:0072330)	25	10	3.22	+	3.11	0.00453	0.0494
cellular modified amino acid metabolic process (GO:0006575)	29	11	3.73	+	2.95	0.0041	0.0457
system process (GO:0003008)	98	37	12.61	+	2.93	2.98e-07	1.78e-05
cell fate commitment (GO:0045165)	33	12	4.25	+	2.83	0.00365	0.0414
carboxylic acid biosynthetic process (GO:0046394)	53	18	6.82	+	2.64	0.000971	0.0146
organic acid biosynthetic process (GO:0016053)	53	18	6.82	+	2.64	0.000971	0.0145
anatomical structure formation involved in morphogenesis (GO:0048646)	66	22	8.49	+	2.59	0.000293	0.0055
axon guidance (GO:0007411)	75	25	9.65	+	2.59	0.000179	0.00371
neuron projection guidance (GO:0097485)	75	25	9.65	+	2.59	0.000179	0.00367
taxis (GO:0042330)	101	32	13	+	2.46	4.34e-05	0.00114
chemotaxis (GO:0006935)	101	32	13	+	2.46	4.34e-05	0.00113
positive regulation of multicellular organismal process (GO:0051240)	63	19	8.11	+	2.34	0.00238	0.0312
axon development (GO:0061564)	96	28	12.36	+	2.27	0.000317	0.00579
axonogenesis (GO:0007409)	96	28	12.36	+	2.27	0.000317	0.00574
tissue development (GO:0009888)	128	36	16.47	+	2.19	9.54e-05	0.00228
lipid biosynthetic process (GO:0008610)	93	26	11.97	+	2.17	0.00114	0.0162
cell morphogenesis involved in neuron differentiation (GO:0048667)	104	29	13.39	+	2.17	0.000498	0.00865
lipid metabolic process (GO:0006629)	201	54	25.87	+	2.09	5.39e-06	0.000203
cell part morphogenesis (GO:0032990)	117	31	15.06	+	2.06	0.000645	0.0106
cell projection morphogenesis (GO:0048858)	117	31	15.06	+	2.06	0.000645	0.0105
neuron projection morphogenesis (GO:0048812)	117	31	15.06	+	2.06	0.000645	0.0104
plasma membrane bounded cell projection morphogenesis (GO:0120039)	117	31	15.06	+	2.06	0.000645	0.0103
cell development (GO:0048468)	229	60	29.47	+	2.04	3.23e-06	0.000131
response to external stimulus (GO:0009605)	188	48	24.2	+	1.98	6.68e-05	0.0017
chemical synaptic transmission (GO:0007268)	103	26	13.26	+	1.96	0.00322	0.0396
anterograde trans-synaptic signaling (GO:0098916)	103	26	13.26	+	1.96	0.00322	0.0393
cellular lipid metabolic process (GO:0044255)	177	44	22.78	+	1.93	0.000233	0.00464
neuron differentiation (GO:0030182)	174	43	22.39	+	1.92	0.000314	0.0058
cell differentiation (GO:0030154)	415	102	53.41	+	1.91	1.56e-08	2.12e-06
metal ion transport (GO:0030001)	160	39	20.59	+	1.89	0.000649	0.0103
cell morphogenesis involved in differentiation (GO:0000904)	132	32	16.99	+	1.88	0.00264	0.0338
cellular component morphogenesis (GO:0032989)	207	50	26.64	+	1.88	0.000138	0.00311
neuron projection development (GO:0031175)	141	34	18.15	+	1.87	0.00166	0.0228
generation of neurons (GO:0048699)	183	44	23.55	+	1.87	0.00043	0.00753
animal organ development (GO:0048513)	163	39	20.98	+	1.86	0.00105	0.0153
multicellular organismal process (GO:0032501)	565	135	72.72	+	1.86	3.6e-10	9.14e-08
neuron development (GO:0048666)	146	34	18.79	+	1.81	0.00287	0.0364
cation transport (GO:0006812)	211	49	27.16	+	1.8	0.000343	0.00612
neurogenesis (GO:0022008)	194	45	24.97	+	1.8	0.000625	0.0103
system development (GO:0048731)	393	91	50.58	+	1.8	1.12e-06	5.15e-05
ion transport (GO:0006811)	324	75	41.7	+	1.8	1.23e-05	0.000385
anatomical structure morphogenesis (GO:0009653)	290	67	37.32	+	1.8	3e-05	0.000825
cell-cell signaling (GO:0007267)	169	39	21.75	+	1.79	0.00185	0.0252
nervous system development (GO:0007399)	253	58	32.56	+	1.78	0.00013	0.00301
cellular developmental process (GO:0048869)	454	102	58.43	+	1.75	7e-07	3.56e-05
anatomical structure development (GO:0048856)	557	125	71.69	+	1.74	3.56e-08	3.62e-06
multicellular organism development (GO:0007275)	445	99	57.27	+	1.73	1.55e-06	6.87e-05
locomotion (GO:0040011)	207	45	26.64	+	1.69	0.00244	0.0315
developmental process (GO:0032502)	626	135	80.57	+	1.68	8.54e-08	6.19e-06
ion transmembrane transport (GO:0034220)	208	44	26.77	+	1.64	0.00353	0.0414
response to chemical (GO:0042221)	390	80	50.2	+	1.59	0.000197	0.00399
signaling (GO:0023052)	962	159	123.81	+	1.28	0.00248	0.0319
cell communication (GO:0007154)	963	159	123.94	+	1.28	0.00291	0.0362
cellular component organization or biogenesis (GO:0071840)	1435	147	184.69	-	0.8	0.00416	0.0457
cellular biosynthetic process (GO:0044249)	1149	114	147.88	-	0.77	0.0041	0.0455
organonitrogen compound metabolic process (GO:1901564)	1370	134	176.33	-	0.76	0.000897	0.0139
metabolic process (GO:0008152)	2671	253	343.77	-	0.74	2.48e-08	2.65e-06
organic substance metabolic process (GO:0071704)	2562	242	329.74	-	0.73	5.16e-08	4.03e-06
regulation of macromolecule metabolic process (GO:0060255)	989	92	127.29	-	0.72	0.00125	0.0177
primary metabolic process (GO:0044238)	2464	225	317.13	-	0.71	5.28e-09	7.66e-07
cellular metabolic process (GO:0044237)	2532	231	325.88	-	0.71	2.55e-09	4.31e-07
regulation of gene expression (GO:0010468)	749	65	96.4	-	0.67	0.00107	0.0154
cellular nitrogen compound biosynthetic process (GO:0044271)	943	81	121.37	-	0.67	0.000158	0.00342
nitrogen compound metabolic process (GO:0006807)	2341	200	301.3	-	0.66	4.13e-11	1.2e-08
cellular localization (GO:0051641)	582	49	74.91	-	0.65	0.00239	0.0311
organelle organization (GO:0006996)	1005	84	129.35	-	0.65	2.94e-05	0.00083
organic cyclic compound metabolic process (GO:1901360)	1293	103	166.42	-	0.62	1.24e-07	8.15e-06
cellular macromolecule biosynthetic process (GO:0034645)	933	73	120.08	-	0.61	5.65e-06	0.000209
macromolecule biosynthetic process (GO:0009059)	936	73	120.47	-	0.61	5.7e-06	0.000207
cellular aromatic compound metabolic process (GO:0006725)	1271	97	163.59	-	0.59	2e-08	2.26e-06
response to stress (GO:0006950)	384	29	49.42	-	0.59	0.00339	0.0407
cellular nitrogen compound metabolic process (GO:0034641)	1421	107	182.89	-	0.59	1.08e-09	2.19e-07
proteolysis (GO:0006508)	375	28	48.26	-	0.58	0.00305	0.0378
heterocycle metabolic process (GO:0046483)	1267	93	163.07	-	0.57	2.69e-09	4.21e-07
nucleobase-containing compound metabolic process (GO:0006139)	1243	90	159.98	-	0.56	1.95e-09	3.6e-07
cellular protein modification process (GO:0006464)	705	51	90.74	-	0.56	1.08e-05	0.000358
protein modification process (GO:0036211)	705	51	90.74	-	0.56	1.08e-05	0.000352
cellular macromolecule metabolic process (GO:0044260)	1817	128	233.86	-	0.55	6.98e-15	7.09e-12
macromolecule metabolic process (GO:0043170)	2140	149	275.43	-	0.54	2.52e-18	5.11e-15
RNA metabolic process (GO:0016070)	965	66	124.2	-	0.53	1.74e-08	2.08e-06
protein metabolic process (GO:0019538)	1131	77	145.57	-	0.53	6.66e-10	1.5e-07
protein localization (GO:0008104)	427	29	54.96	-	0.53	0.000285	0.00541
macromolecule modification (GO:0043412)	768	52	98.85	-	0.53	5.87e-07	3.22e-05
cellular protein localization (GO:0034613)	395	25	50.84	-	0.49	0.000158	0.00344
cellular macromolecule localization (GO:0070727)	396	25	50.97	-	0.49	0.000159	0.0034
intracellular transport (GO:0046907)	403	25	51.87	-	0.48	9.52e-05	0.0023
protein-containing complex assembly (GO:0065003)	229	14	29.47	-	0.48	0.00401	0.045
nucleic acid metabolic process (GO:0090304)	1125	68	144.79	-	0.47	1.85e-12	1.25e-09
gene expression (GO:0010467)	1126	68	144.92	-	0.47	1.87e-12	9.5e-10
amide transport (GO:0042886)	336	20	43.25	-	0.46	0.000241	0.00476
cellular protein metabolic process (GO:0044267)	1018	60	131.02	-	0.46	7.03e-12	2.38e-09
establishment of protein localization (GO:0045184)	331	19	42.6	-	0.45	0.000152	0.00335
protein transport (GO:0015031)	326	18	41.96	-	0.43	9.33e-05	0.00231
peptide transport (GO:0015833)	327	18	42.09	-	0.43	9.44e-05	0.00231
protein-containing complex subunit organization (GO:0043933)	285	15	36.68	-	0.41	0.000143	0.0032
intracellular protein transport (GO:0006886)	287	14	36.94	-	0.38	4.66e-05	0.0012
macromolecule catabolic process (GO:0009057)	295	14	37.97	-	0.37	2.57e-05	0.000757
protein catabolic process (GO:0030163)	219	10	28.19	-	0.35	0.000303	0.00565
protein modification by small protein conjugation or removal (GO:0070647)	185	8	23.81	-	0.34	0.000541	0.00923
cellular protein-containing complex assembly (GO:0034622)	210	9	27.03	-	0.33	0.00022	0.00443
chromatin organization (GO:0006325)	127	5	16.35	-	0.31	0.0034	0.0402
cellular response to stress (GO:0033554)	295	11	37.97	-	0.29	1.49e-06	6.74e-05
mitotic cell cycle (GO:0000278)	169	6	21.75	-	0.28	0.000265	0.00517
mitotic cell cycle process (GO:1903047)	169	6	21.75	-	0.28	0.000265	0.00512
mitotic nuclear division (GO:0140014)	169	6	21.75	-	0.28	0.000265	0.00507
cell cycle process (GO:0022402)	236	8	30.37	-	0.26	5.74e-06	0.000205
organelle fission (GO:0048285)	207	7	26.64	-	0.26	2.81e-05	0.000814
Golgi vesicle transport (GO:0048193)	152	5	19.56	-	0.26	0.000332	0.00597
nuclear division (GO:0000280)	192	6	24.71	-	0.24	3.61e-05	0.000964
establishment of protein localization to organelle (GO:0072594)	98	3	12.61	-	0.24	0.0041	0.0453
cell cycle (GO:0007049)	264	8	33.98	-	0.24	5.39e-07	3.04e-05
cellular protein catabolic process (GO:0044257)	205	6	26.38	-	0.23	8.72e-06	0.000295
peptide metabolic process (GO:0006518)	177	5	22.78	-	0.22	2.95e-05	0.000819
protein localization to organelle (GO:0033365)	185	5	23.81	-	0.21	1.47e-05	0.000451
cellular macromolecule catabolic process (GO:0044265)	276	7	35.52	-	0.2	3.67e-08	3.39e-06
proteolysis involved in cellular protein catabolic process (GO:0051603)	204	5	26.26	-	0.19	2.5e-06	0.000108
proteasome-mediated ubiquitin-dependent protein catabolic process (GO:0043161)	129	3	16.6	-	0.18	0.000164	0.00347
chromosome organization (GO:0051276)	220	5	28.32	-	0.18	3.94e-07	2.28e-05
proteasomal protein catabolic process (GO:0010498)	135	3	17.38	-	0.17	0.000117	0.00273
ubiquitin-dependent protein catabolic process (GO:0006511)	181	4	23.3	-	0.17	5.86e-06	0.000205
modification-dependent protein catabolic process (GO:0019941)	184	4	23.68	-	0.17	3.98e-06	0.000158
modification-dependent macromolecule catabolic process (GO:0043632)	188	4	24.2	-	0.17	2.79e-06	0.000116
amide biosynthetic process (GO:0043604)	160	3	20.59	-	0.15	8.7e-06	0.0003
cellular response to DNA damage stimulus (GO:0006974)	170	3	21.88	-	0.14	2.76e-06	0.000117
DNA metabolic process (GO:0006259)	190	3	24.45	-	0.12	2.77e-07	1.7e-05
regulation of mitotic cell cycle (GO:0007346)	70	1	9.01	-	0.11	0.00398	0.0449
rRNA processing (GO:0006364)	82	1	10.55	-	0.09	0.000798	0.0125
rRNA metabolic process (GO:0016072)	86	1	11.07	-	0.09	0.00054	0.00929
mRNA splicing, via spliceosome (GO:0000398)	87	1	11.2	-	0.09	0.00055	0.00932
RNA splicing, via transesterification reactions with bulged adenosine as nucleophile (GO:0000377)	87	1	11.2	-	0.09	0.00055	0.00924
RNA splicing, via transesterification reactions (GO:0000375)	87	1	11.2	-	0.09	0.00055	0.00916
RNA splicing (GO:0008380)	98	1	12.61	-	0.08	0.000171	0.00358
ribosome biogenesis (GO:0042254)	112	1	14.42	-	0.07	3.48e-05	0.000941
mRNA processing (GO:0006397)	118	1	15.19	-	0.07	1.52e-05	0.000453
regulation of cell cycle (GO:0051726)	130	1	16.73	-	0.06	4.81e-06	0.000188
DNA repair (GO:0006281)	130	1	16.73	-	0.06	4.81e-06	0.000184
RNA processing (GO:0006396)	267	2	34.36	-	0.06	4.68e-12	1.9e-09
ncRNA processing (GO:0034470)	141	1	18.15	-	0.06	8.98e-07	4.45e-05
ribonucleoprotein complex biogenesis (GO:0022613)	147	1	18.92	-	0.05	6.26e-07	3.26e-05
mRNA metabolic process (GO:0016071)	164	1	21.11	-	0.05	8.09e-08	6.09e-06
ncRNA metabolic process (GO:0034660)	179	1	23.04	-	0.04	1.68e-08	2.13e-06
negative regulation of cell cycle (GO:0045786)	52	0	6.69	-	< 0.01	0.0034	0.0406
protein import (GO:0017038)	51	0	6.56	-	< 0.01	0.00334	0.0406
nuclear chromosome segregation (GO:0098813)	55	0	7.08	-	< 0.01	0.0022	0.0295
posttranscriptional regulation of gene expression (GO:0010608)	56	0	7.21	-	< 0.01	0.00227	0.03
regulation of mRNA metabolic process (GO:1903311)	53	0	6.82	-	< 0.01	0.00354	0.0413
translational elongation (GO:0006414)	143	0	18.4	-	< 0.01	3.93e-08	3.47e-06
translation (GO:0006412)	143	0	18.4	-	< 0.01	3.93e-08	3.32e-06
mRNA catabolic process (GO:0006402)	53	0	6.82	-	< 0.01	0.00354	0.0411
RNA catabolic process (GO:0006401)	63	0	8.11	-	< 0.01	0.000983	0.0146
DNA biosynthetic process (GO:0071897)	61	0	7.85	-	< 0.01	0.000942	0.0144
ribonucleoprotein complex subunit organization (GO:0071826)	63	0	8.11	-	< 0.01	0.000983	0.0145
protein-DNA complex subunit organization (GO:0071824)	52	0	6.69	-	< 0.01	0.0034	0.0404
tRNA metabolic process (GO:0006399)	83	0	10.68	-	< 0.01	7.69e-05	0.00193
DNA recombination (GO:0006310)	55	0	7.08	-	< 0.01	0.0022	0.0293
double-strand break repair (GO:0006302)	62	0	7.98	-	< 0.01	0.000951	0.0144
peptide biosynthetic process (GO:0043043)	145	0	18.66	-	< 0.01	4.03e-08	3.27e-06
chromosome segregation (GO:0007059)	63	0	8.11	-	< 0.01	0.000983	0.0144
mitotic cell cycle phase transition (GO:0044772)	51	0	6.56	-	< 0.01	0.00334	0.0404
cell cycle phase transition (GO:0044770)	53	0	6.82	-	< 0.01	0.00354	0.0408
ribonucleoprotein complex assembly (GO:0022618)	59	0	7.59	-	< 0.01	0.00147	0.0205

## Sheet: DFTD-vs-Lip_Up
Analysis Type:	PANTHER Overrepresentation Test (Released 20200407)
Annotation Version and Release Date:	PANTHER version 15.0 Released 2020-02-14
Analyzed List:	upGeneList.txt (Homo sapiens)
Reference List:	allGeneList.txt (Homo sapiens)
Test Type:	FISHER
Correction:	FDR
PANTHER GO-Slim Biological Process	allGeneList.txt - REFLIST (9782)	upGeneList.txt (1319)	upGeneList.txt (expected)	upGeneList.txt (over/under)	upGeneList.txt (fold Enrichment)	upGeneList.txt (raw P-value)	upGeneList.txt (FDR)
adherens junction organization (GO:0034332)	13	8	1.75	+	4.56	0.0019	0.0357
cell-cell junction organization (GO:0045216)	18	10	2.43	+	4.12	0.000943	0.0206
cell-cell adhesion via plasma-membrane adhesion molecules (GO:0098742)	34	18	4.58	+	3.93	1.59e-05	0.000789
inorganic anion transport (GO:0015698)	21	10	2.83	+	3.53	0.00228	0.0418
extracellular matrix organization (GO:0030198)	40	19	5.39	+	3.52	3e-05	0.00127
regulation of membrane potential (GO:0042391)	57	27	7.69	+	3.51	7.07e-07	5.53e-05
extracellular structure organization (GO:0043062)	44	20	5.93	+	3.37	3.06e-05	0.00124
cell-substrate adhesion (GO:0031589)	30	12	4.05	+	2.97	0.00275	0.0447
nervous system process (GO:0050877)	51	19	6.88	+	2.76	0.000518	0.0133
cell-cell adhesion (GO:0098609)	76	25	10.25	+	2.44	0.000281	0.00783
synaptic signaling (GO:0099536)	105	34	14.16	+	2.4	3.03e-05	0.00126
cell adhesion (GO:0007155)	133	43	17.93	+	2.4	2.9e-06	0.000203
biological adhesion (GO:0022610)	133	43	17.93	+	2.4	2.9e-06	0.000196
chemical synaptic transmission (GO:0007268)	103	33	13.89	+	2.38	4.65e-05	0.00178
anterograde trans-synaptic signaling (GO:0098916)	103	33	13.89	+	2.38	4.65e-05	0.00175
trans-synaptic signaling (GO:0099537)	104	33	14.02	+	2.35	8.12e-05	0.00289
system process (GO:0003008)	98	28	13.21	+	2.12	0.00119	0.0253
cell morphogenesis involved in differentiation (GO:0000904)	132	36	17.8	+	2.02	0.000409	0.0107
cell morphogenesis (GO:0000902)	186	50	25.08	+	1.99	3.84e-05	0.0015
cell-cell signaling (GO:0007267)	169	44	22.79	+	1.93	0.000233	0.00687
inorganic ion transmembrane transport (GO:0098660)	158	41	21.3	+	1.92	0.000356	0.00965
cellular component morphogenesis (GO:0032989)	207	53	27.91	+	1.9	8.74e-05	0.00296
anatomical structure morphogenesis (GO:0009653)	290	73	39.1	+	1.87	4.68e-06	0.000307
animal organ development (GO:0048513)	163	40	21.98	+	1.82	0.00134	0.0278
localization of cell (GO:0051674)	156	38	21.03	+	1.81	0.00162	0.0322
cell motility (GO:0048870)	156	38	21.03	+	1.81	0.00162	0.0319
locomotion (GO:0040011)	207	50	27.91	+	1.79	0.000397	0.0105
metal ion transport (GO:0030001)	160	38	21.57	+	1.76	0.00257	0.0422
multicellular organismal process (GO:0032501)	565	131	76.18	+	1.72	4.14e-08	4.42e-06
multicellular organism development (GO:0007275)	445	101	60	+	1.68	4.74e-06	0.000301
ion transmembrane transport (GO:0034220)	208	47	28.05	+	1.68	0.00223	0.0412
developmental process (GO:0032502)	626	141	84.41	+	1.67	6.13e-08	6.22e-06
system development (GO:0048731)	393	88	52.99	+	1.66	2.66e-05	0.00115
cation transport (GO:0006812)	211	47	28.45	+	1.65	0.00245	0.0429
anatomical structure development (GO:0048856)	557	124	75.11	+	1.65	6.42e-07	5.22e-05
ion transport (GO:0006811)	324	72	43.69	+	1.65	0.000187	0.00586
movement of cell or subcellular component (GO:0006928)	327	72	44.09	+	1.63	0.000266	0.00749
nervous system development (GO:0007399)	253	55	34.11	+	1.61	0.00171	0.0334
regulation of response to stimulus (GO:0048583)	387	84	52.18	+	1.61	0.000107	0.00357
cellular developmental process (GO:0048869)	454	96	61.22	+	1.57	8.23e-05	0.00288
regulation of cell communication (GO:0010646)	339	70	45.71	+	1.53	0.00138	0.0282
regulation of signaling (GO:0023051)	341	70	45.98	+	1.52	0.0018	0.0345
cell surface receptor signaling pathway (GO:0007166)	341	70	45.98	+	1.52	0.0018	0.0342
cell differentiation (GO:0030154)	415	84	55.96	+	1.5	0.00084	0.0187
regulation of biological quality (GO:0065008)	495	94	66.75	+	1.41	0.00254	0.042
signaling (GO:0023052)	962	182	129.72	+	1.4	2.07e-05	0.000955
cell communication (GO:0007154)	963	181	129.85	+	1.39	2.61e-05	0.00115
signal transduction (GO:0007165)	894	161	120.55	+	1.34	0.000547	0.0135
response to stimulus (GO:0050896)	1277	212	172.19	+	1.23	0.00297	0.0479
organonitrogen compound metabolic process (GO:1901564)	1370	142	184.73	-	0.77	0.00114	0.0244
protein metabolic process (GO:0019538)	1131	112	152.5	-	0.73	0.000679	0.0158
cellular protein metabolic process (GO:0044267)	1018	100	137.27	-	0.73	0.00108	0.0233
metabolic process (GO:0008152)	2671	249	360.16	-	0.69	2.36e-11	5.32e-09
regulation of cellular biosynthetic process (GO:0031326)	670	62	90.34	-	0.69	0.00254	0.0423
regulation of biosynthetic process (GO:0009889)	674	62	90.88	-	0.68	0.00214	0.0398
regulation of nucleobase-containing compound metabolic process (GO:0019219)	682	62	91.96	-	0.67	0.00151	0.0303
cellular macromolecule metabolic process (GO:0044260)	1817	165	245	-	0.67	2.57e-08	2.91e-06
regulation of gene expression (GO:0010468)	749	68	100.99	-	0.67	0.000892	0.0197
regulation of RNA metabolic process (GO:0051252)	655	59	88.32	-	0.67	0.0015	0.0305
cellular localization (GO:0051641)	582	52	78.48	-	0.66	0.00239	0.0429
organic substance metabolic process (GO:0071704)	2562	228	345.46	-	0.66	5e-13	2.54e-10
nitrogen compound metabolic process (GO:0006807)	2341	207	315.66	-	0.66	5.42e-12	2.2e-09
regulation of cellular macromolecule biosynthetic process (GO:2000112)	659	58	88.86	-	0.65	0.000815	0.0186
regulation of macromolecule biosynthetic process (GO:0010556)	661	58	89.13	-	0.65	0.000819	0.0185
cellular metabolic process (GO:0044237)	2532	221	341.41	-	0.65	8.51e-14	8.64e-11
primary metabolic process (GO:0044238)	2464	215	332.24	-	0.65	2.36e-13	1.6e-10
macromolecule metabolic process (GO:0043170)	2140	185	288.56	-	0.64	8.31e-12	2.11e-09
regulation of transcription, DNA-templated (GO:0006355)	603	51	81.31	-	0.63	0.000592	0.0145
regulation of nucleic acid-templated transcription (GO:1903506)	603	51	81.31	-	0.63	0.000592	0.0143
regulation of RNA biosynthetic process (GO:2001141)	603	51	81.31	-	0.63	0.000592	0.0142
cellular biosynthetic process (GO:0044249)	1149	96	154.93	-	0.62	4.77e-07	4.04e-05
organic substance biosynthetic process (GO:1901576)	1156	96	155.87	-	0.62	3.14e-07	2.9e-05
biosynthetic process (GO:0009058)	1171	97	157.9	-	0.61	2.24e-07	2.16e-05
nucleic acid-templated transcription (GO:0097659)	630	52	84.95	-	0.61	0.000237	0.00687
transcription, DNA-templated (GO:0006351)	630	52	84.95	-	0.61	0.000237	0.00678
RNA biosynthetic process (GO:0032774)	634	52	85.49	-	0.61	0.000193	0.00586
cellular macromolecule biosynthetic process (GO:0034645)	933	75	125.81	-	0.6	1.88e-06	0.000137
macromolecule biosynthetic process (GO:0009059)	936	75	126.21	-	0.59	1.51e-06	0.000114
organic cyclic compound biosynthetic process (GO:1901362)	800	64	107.87	-	0.59	1.1e-05	0.000571
intracellular transport (GO:0046907)	403	32	54.34	-	0.59	0.0024	0.0427
heterocycle biosynthetic process (GO:0018130)	783	62	105.58	-	0.59	8.96e-06	0.000505
aromatic compound biosynthetic process (GO:0019438)	783	62	105.58	-	0.59	8.96e-06	0.000492
nucleobase-containing compound biosynthetic process (GO:0034654)	770	60	103.83	-	0.58	5.88e-06	0.000351
cellular nitrogen compound biosynthetic process (GO:0044271)	943	73	127.15	-	0.57	3.29e-07	2.9e-05
organic substance catabolic process (GO:1901575)	441	34	59.46	-	0.57	0.000812	0.0188
cellular catabolic process (GO:0044248)	474	35	63.91	-	0.55	0.000189	0.00582
organic cyclic compound metabolic process (GO:1901360)	1293	95	174.35	-	0.54	5.64e-11	8.82e-09
heterocycle metabolic process (GO:0046483)	1267	92	170.84	-	0.54	5.05e-11	8.54e-09
cellular aromatic compound metabolic process (GO:0006725)	1271	92	171.38	-	0.54	3.93e-11	7.26e-09
nucleobase-containing compound metabolic process (GO:0006139)	1243	89	167.61	-	0.53	3.43e-11	6.96e-09
cellular nitrogen compound metabolic process (GO:0034641)	1421	98	191.61	-	0.51	7.75e-14	1.57e-10
nucleic acid metabolic process (GO:0090304)	1125	75	151.69	-	0.49	7.85e-12	2.28e-09
proteolysis (GO:0006508)	375	25	50.56	-	0.49	0.000198	0.00591
gene expression (GO:0010467)	1126	75	151.83	-	0.49	7.81e-12	2.64e-09
RNA metabolic process (GO:0016070)	965	63	130.12	-	0.48	1.4e-10	2.03e-08
chromosome organization (GO:0051276)	220	12	29.66	-	0.4	0.000656	0.0155
cellular response to DNA damage stimulus (GO:0006974)	170	9	22.92	-	0.39	0.00234	0.0425
macromolecule catabolic process (GO:0009057)	295	15	39.78	-	0.38	2.44e-05	0.0011
peptide metabolic process (GO:0006518)	177	9	23.87	-	0.38	0.0013	0.0272
cellular amide metabolic process (GO:0043603)	218	11	29.4	-	0.37	0.000391	0.0105
cellular macromolecule catabolic process (GO:0044265)	276	13	37.22	-	0.35	1.85e-05	0.000874
protein catabolic process (GO:0030163)	219	10	29.53	-	0.34	0.000114	0.00375
proteasomal protein catabolic process (GO:0010498)	135	6	18.2	-	0.33	0.00244	0.0431
proteolysis involved in cellular protein catabolic process (GO:0051603)	204	9	27.51	-	0.33	0.000154	0.00497
cellular protein catabolic process (GO:0044257)	205	9	27.64	-	0.33	0.000157	0.00497
protein modification by small protein conjugation (GO:0032446)	138	6	18.61	-	0.32	0.00253	0.0424
protein modification by small protein conjugation or removal (GO:0070647)	185	8	24.95	-	0.32	0.000282	0.00773
proteasome-mediated ubiquitin-dependent protein catabolic process (GO:0043161)	129	5	17.39	-	0.29	0.00174	0.0336
mRNA metabolic process (GO:0016071)	164	5	22.11	-	0.23	5.8e-05	0.0021
ubiquitin-dependent protein catabolic process (GO:0006511)	181	5	24.41	-	0.2	9.83e-06	0.000525
modification-dependent protein catabolic process (GO:0019941)	184	5	24.81	-	0.2	6.83e-06	0.000396
modification-dependent macromolecule catabolic process (GO:0043632)	188	5	25.35	-	0.2	4.8e-06	0.000296
cofactor metabolic process (GO:0051186)	87	2	11.73	-	0.17	0.00248	0.0431
mRNA splicing, via spliceosome (GO:0000398)	87	2	11.73	-	0.17	0.00248	0.0427
RNA splicing, via transesterification reactions with bulged adenosine as nucleophile (GO:0000377)	87	2	11.73	-	0.17	0.00248	0.0424
RNA splicing, via transesterification reactions (GO:0000375)	87	2	11.73	-	0.17	0.00248	0.042
RNA processing (GO:0006396)	267	6	36	-	0.17	6.15e-09	7.8e-07
ribonucleoprotein complex biogenesis (GO:0022613)	147	3	19.82	-	0.15	1.78e-05	0.000861
establishment of protein localization to organelle (GO:0072594)	98	2	13.21	-	0.15	0.000526	0.0134
mRNA processing (GO:0006397)	118	2	15.91	-	0.13	8.48e-05	0.00292
tRNA metabolic process (GO:0006399)	83	1	11.19	-	0.09	0.000527	0.0132
ribosome biogenesis (GO:0042254)	112	1	15.1	-	0.07	1.44e-05	0.00073
ncRNA metabolic process (GO:0034660)	179	1	24.14	-	0.04	4.17e-09	5.64e-07
ncRNA processing (GO:0034470)	141	0	19.01	-	< 0.01	2.4e-08	2.87e-06
rRNA processing (GO:0006364)	82	0	11.06	-	< 0.01	4.76e-05	0.00176
rRNA metabolic process (GO:0016072)	86	0	11.6	-	< 0.01	3.15e-05	0.00126

## Sheet: Lips_TKN-vs-BR_Down
Analysis Type:	PANTHER Overrepresentation Test (Released 20200728)
Annotation Version and Release Date:	PANTHER version 15.0 Released 2020-02-14
Analyzed List:	Client Text Box Input (Homo sapiens)
Reference List:	allGeneList_lips.txt (Homo sapiens)
Test Type:	FISHER
Correction:	FDR
PANTHER GO-Slim Biological Process	allGeneList_lips.txt - REFLIST (9527)	Client Text Box Input (450)	Client Text Box Input (expected)	Client Text Box Input (over/under)	Client Text Box Input (fold Enrichment)	Client Text Box Input (raw P-value)	Client Text Box Input (FDR)
immune response (GO:0006955)	75	13	3.54	+	3.67	0.000146	0.0371
immune system process (GO:0002376)	111	19	5.24	+	3.62	5.36e-06	0.0109
regulation of anatomical structure size (GO:0090066)	78	13	3.68	+	3.53	0.000207	0.042
regulation of cellular component size (GO:0032535)	72	12	3.4	+	3.53	0.00036	0.0487
taxis (GO:0042330)	95	15	4.49	+	3.34	0.000117	0.0477
chemotaxis (GO:0006935)	95	15	4.49	+	3.34	0.000117	0.0397
actin filament organization (GO:0007015)	106	15	5.01	+	3	0.000342	0.0497
cell part morphogenesis (GO:0032990)	107	15	5.05	+	2.97	0.000375	0.0476
cell projection morphogenesis (GO:0048858)	107	15	5.05	+	2.97	0.000375	0.0448
neuron projection morphogenesis (GO:0048812)	107	15	5.05	+	2.97	0.000375	0.0423
plasma membrane bounded cell projection morphogenesis (GO:0120039)	107	15	5.05	+	2.97	0.000375	0.04
cell migration (GO:0016477)	136	18	6.42	+	2.8	0.000192	0.0433
actin filament-based process (GO:0030029)	168	21	7.94	+	2.65	0.00012	0.0347
actin cytoskeleton organization (GO:0030036)	163	20	7.7	+	2.6	0.000216	0.04
response to external stimulus (GO:0009605)	180	22	8.5	+	2.59	0.000112	0.0566
cellular component morphogenesis (GO:0032989)	193	22	9.12	+	2.41	0.000319	0.0498
anatomical structure morphogenesis (GO:0009653)	273	29	12.89	+	2.25	0.000108	0.073
cellular developmental process (GO:0048869)	430	39	20.31	+	1.92	0.000217	0.0367
developmental process (GO:0032502)	595	52	28.1	+	1.85	4.77e-05	0.0485

## Sheet: Lips_TKN-vs-BR_Up
Analysis Type:	PANTHER Overrepresentation Test (Released 20200728)
Annotation Version and Release Date:	PANTHER version 15.0 Released 2020-02-14
Analyzed List:	Client Text Box Input (Homo sapiens)
Reference List:	allGeneList_lips.txt (Homo sapiens)
Test Type:	FISHER
Correction:	FDR
PANTHER GO-Slim Biological Process	allGeneList_lips.txt - REFLIST (9527)	Client Text Box Input (638)	Client Text Box Input (expected)	Client Text Box Input (over/under)	Client Text Box Input (fold Enrichment)	Client Text Box Input (raw P-value)	Client Text Box Input (FDR)
lipid biosynthetic process (GO:0008610)	93	26	6.23	+	4.17	1.55e-08	1.57e-05
fatty acid metabolic process (GO:0006631)	59	16	3.95	+	4.05	1.27e-05	0.00514
monocarboxylic acid metabolic process (GO:0032787)	82	21	5.49	+	3.82	1.26e-06	0.000855
lipid metabolic process (GO:0006629)	198	43	13.26	+	3.24	3.22e-10	6.53e-07
cellular lipid metabolic process (GO:0044255)	176	31	11.79	+	2.63	6.34e-06	0.00322
nucleic acid metabolic process (GO:0090304)	1109	43	74.27	-	0.58	7.78e-05	0.0263

## Sheet: Tumors_BR-vs-WPP_Down
Analysis Type:	PANTHER Overrepresentation Test (Released 20200407)
Annotation Version and Release Date:	PANTHER version 15.0 Released 2020-02-14
Analyzed List:	downGeneList.txt (Homo sapiens)
Reference List:	allGeneList_tumors.txt (Homo sapiens)
Test Type:	FISHER
Correction:	FDR
PANTHER GO-Slim Biological Process	allGeneList_tumors.txt - REFLIST (9419)	downGeneList.txt (1541)	downGeneList.txt (expected)	downGeneList.txt (over/under)	downGeneList.txt (fold Enrichment)	downGeneList.txt (raw P-value)	downGeneList.txt (FDR)
chromosome organization (GO:0051276)	219	73	35.83	+	2.04	5.25e-07	0.00107
positive regulation of nucleic acid-templated transcription (GO:1903508)	235	73	38.45	+	1.9	3.98e-06	0.00135
positive regulation of transcription, DNA-templated (GO:0045893)	235	73	38.45	+	1.9	3.98e-06	0.00115
positive regulation of RNA biosynthetic process (GO:1902680)	235	73	38.45	+	1.9	3.98e-06	0.00101
positive regulation of RNA metabolic process (GO:0051254)	245	76	40.08	+	1.9	2.74e-06	0.00139
chromatin organization (GO:0006325)	126	39	20.61	+	1.89	0.000938	0.0381
positive regulation of macromolecule biosynthetic process (GO:0010557)	253	77	41.39	+	1.86	3.93e-06	0.00159
positive regulation of nucleobase-containing compound metabolic process (GO:0045935)	257	78	42.05	+	1.86	4.34e-06	0.00098
positive regulation of cellular biosynthetic process (GO:0031328)	258	78	42.21	+	1.85	4.57e-06	0.000929
positive regulation of biosynthetic process (GO:0009891)	259	78	42.37	+	1.84	4.86e-06	0.000897
positive regulation of gene expression (GO:0010628)	262	78	42.86	+	1.82	7.59e-06	0.0011
positive regulation of transcription by RNA polymerase II (GO:0045944)	192	56	31.41	+	1.78	0.000278	0.0134
positive regulation of nitrogen compound metabolic process (GO:0051173)	410	104	67.08	+	1.55	8.95e-05	0.00519
regulation of transcription by RNA polymerase II (GO:0006357)	410	104	67.08	+	1.55	8.95e-05	0.00505
positive regulation of macromolecule metabolic process (GO:0010604)	418	106	68.39	+	1.55	7.92e-05	0.00487
transcription by RNA polymerase II (GO:0006366)	428	108	70.02	+	1.54	7.3e-05	0.00463
regulation of nucleobase-containing compound metabolic process (GO:0019219)	659	165	107.82	+	1.53	1.13e-06	0.000765
positive regulation of cellular metabolic process (GO:0031325)	406	101	66.42	+	1.52	0.000186	0.00968
positive regulation of metabolic process (GO:0009893)	433	107	70.84	+	1.51	0.000169	0.00905
regulation of transcription, DNA-templated (GO:0006355)	581	143	95.05	+	1.5	1.18e-05	0.0012
regulation of nucleic acid-templated transcription (GO:1903506)	581	143	95.05	+	1.5	1.18e-05	0.00114
regulation of RNA biosynthetic process (GO:2001141)	581	143	95.05	+	1.5	1.18e-05	0.00109
regulation of RNA metabolic process (GO:0051252)	632	155	103.4	+	1.5	5.72e-06	0.000968
nucleic acid-templated transcription (GO:0097659)	608	149	99.47	+	1.5	1.05e-05	0.00119
transcription, DNA-templated (GO:0006351)	608	149	99.47	+	1.5	1.05e-05	0.00112
RNA biosynthetic process (GO:0032774)	612	149	100.13	+	1.49	1.42e-05	0.0012
regulation of cellular macromolecule biosynthetic process (GO:2000112)	637	154	104.22	+	1.48	1.26e-05	0.00111
regulation of cellular biosynthetic process (GO:0031326)	647	156	105.85	+	1.47	1.43e-05	0.00116
regulation of macromolecule biosynthetic process (GO:0010556)	639	154	104.54	+	1.47	1.62e-05	0.00122
regulation of biosynthetic process (GO:0009889)	650	156	106.34	+	1.47	1.51e-05	0.00118
regulation of gene expression (GO:0010468)	726	173	118.78	+	1.46	7.77e-06	0.000986
regulation of nitrogen compound metabolic process (GO:0051171)	897	206	146.75	+	1.4	7.22e-06	0.00113
regulation of primary metabolic process (GO:0080090)	904	207	147.9	+	1.4	7.77e-06	0.00105
nucleic acid metabolic process (GO:0090304)	1101	252	180.13	+	1.4	6.24e-07	0.000634
RNA metabolic process (GO:0016070)	941	214	153.95	+	1.39	8.93e-06	0.00107
regulation of cellular metabolic process (GO:0031323)	925	208	151.34	+	1.37	2.12e-05	0.00154
regulation of macromolecule metabolic process (GO:0060255)	958	214	156.73	+	1.37	2.3e-05	0.00161
regulation of metabolic process (GO:0019222)	1006	221	164.59	+	1.34	4.07e-05	0.00276
nucleobase-containing compound biosynthetic process (GO:0034654)	747	161	122.21	+	1.32	0.00118	0.0453
nucleobase-containing compound metabolic process (GO:0006139)	1218	260	199.27	+	1.3	4.71e-05	0.00308
cellular macromolecule biosynthetic process (GO:0034645)	911	193	149.04	+	1.29	0.000844	0.0365
macromolecule biosynthetic process (GO:0009059)	914	193	149.54	+	1.29	0.000864	0.0358
gene expression (GO:0010467)	1104	233	180.62	+	1.29	0.000218	0.011
heterocycle metabolic process (GO:0046483)	1243	262	203.36	+	1.29	8.93e-05	0.00533
cellular aromatic compound metabolic process (GO:0006725)	1244	262	203.53	+	1.29	9.01e-05	0.00494
organelle organization (GO:0006996)	993	208	162.46	+	1.28	0.000815	0.036
organic cyclic compound metabolic process (GO:1901360)	1266	262	207.12	+	1.26	0.000259	0.0128
cellular component organization (GO:0016043)	1317	269	215.47	+	1.25	0.000434	0.0205
cellular component organization or biogenesis (GO:0071840)	1406	281	230.03	+	1.22	0.00105	0.041
cellular macromolecule metabolic process (GO:0044260)	1773	345	290.07	+	1.19	0.0012	0.0453
small molecule metabolic process (GO:0044281)	337	30	55.14	-	0.54	0.000563	0.026
oxidation-reduction process (GO:0055114)	100	4	16.36	-	0.24	0.000982	0.0391
nucleotide metabolic process (GO:0009117)	90	3	14.72	-	0.2	0.000845	0.0357
nucleoside phosphate metabolic process (GO:0006753)	93	3	15.22	-	0.2	0.000586	0.0264

## Sheet: Tumors_BR-vs-WPP_Up
Analysis Type:	PANTHER Overrepresentation Test (Released 20200407)
Annotation Version and Release Date:	PANTHER version 15.0 Released 2020-02-14
Analyzed List:	upGeneList.txt (Homo sapiens)
Reference List:	allGeneList_tumors.txt (Homo sapiens)
Test Type:	FISHER
Correction:	FDR
PANTHER GO-Slim Biological Process	allGeneList_tumors.txt - REFLIST (9419)	upGeneList.txt (1094)	upGeneList.txt (expected)	upGeneList.txt (over/under)	upGeneList.txt (fold Enrichment)	upGeneList.txt (raw P-value)	upGeneList.txt (FDR)
cytoplasmic translation (GO:0002181)	26	16	3.02	+	5.3	2.05e-06	0.000278
purine nucleoside triphosphate biosynthetic process (GO:0009145)	18	11	2.09	+	5.26	8.67e-05	0.00568
purine nucleoside triphosphate metabolic process (GO:0009144)	18	11	2.09	+	5.26	8.67e-05	0.0055
ATP biosynthetic process (GO:0006754)	18	11	2.09	+	5.26	8.67e-05	0.00534
ATP synthesis coupled proton transport (GO:0015986)	18	11	2.09	+	5.26	8.67e-05	0.00518
energy coupled proton transport, down electrochemical gradient (GO:0015985)	18	11	2.09	+	5.26	8.67e-05	0.00503
purine ribonucleoside triphosphate biosynthetic process (GO:0009206)	18	11	2.09	+	5.26	8.67e-05	0.00489
purine ribonucleoside triphosphate metabolic process (GO:0009205)	18	11	2.09	+	5.26	8.67e-05	0.00476
ribonucleoside triphosphate metabolic process (GO:0009199)	20	12	2.32	+	5.17	4.73e-05	0.004
ribonucleoside triphosphate biosynthetic process (GO:0009201)	20	12	2.32	+	5.17	4.73e-05	0.00384
nucleoside triphosphate metabolic process (GO:0009141)	26	15	3.02	+	4.97	7.68e-06	0.000867
nucleoside triphosphate biosynthetic process (GO:0009142)	23	13	2.67	+	4.87	3.65e-05	0.00337
proton transmembrane transport (GO:1902600)	23	12	2.67	+	4.49	0.00013	0.00677
ribosomal large subunit biogenesis (GO:0042273)	37	18	4.3	+	4.19	6.04e-06	0.000721
DNA-templated transcription, initiation (GO:0006352)	24	11	2.79	+	3.95	0.000582	0.0246
translational initiation (GO:0006413)	22	10	2.56	+	3.91	0.00108	0.0407
ATP metabolic process (GO:0046034)	29	13	3.37	+	3.86	0.000223	0.0105
ribonucleoprotein complex subunit organization (GO:0071826)	62	24	7.2	+	3.33	4.42e-06	0.00056
ribonucleoprotein complex assembly (GO:0022618)	58	22	6.74	+	3.27	1.42e-05	0.00144
translational elongation (GO:0006414)	143	54	16.61	+	3.25	1.16e-11	2.35e-08
translation (GO:0006412)	143	54	16.61	+	3.25	1.16e-11	1.17e-08
peptide biosynthetic process (GO:0043043)	145	54	16.84	+	3.21	1.77e-11	7.2e-09
amide biosynthetic process (GO:0043604)	159	56	18.47	+	3.03	4.35e-11	1.47e-08
cellular respiration (GO:0045333)	40	14	4.65	+	3.01	0.000964	0.0376
energy derivation by oxidation of organic compounds (GO:0015980)	43	15	4.99	+	3	0.000661	0.0274
peptide metabolic process (GO:0006518)	177	61	20.56	+	2.97	1.53e-11	1.04e-08
mitochondrial transport (GO:0006839)	42	14	4.88	+	2.87	0.00142	0.0496
generation of precursor metabolites and energy (GO:0006091)	58	19	6.74	+	2.82	0.000259	0.0117
cellular amide metabolic process (GO:0043603)	214	68	24.86	+	2.74	1.7e-11	8.61e-09
ribosome biogenesis (GO:0042254)	112	30	13.01	+	2.31	0.000139	0.00705
cellular protein-containing complex assembly (GO:0034622)	209	55	24.27	+	2.27	3.66e-07	7.44e-05
nucleoside phosphate metabolic process (GO:0006753)	93	24	10.8	+	2.22	0.0011	0.0407
ribonucleoprotein complex biogenesis (GO:0022613)	146	37	16.96	+	2.18	6.94e-05	0.00486
protein-containing complex assembly (GO:0065003)	226	57	26.25	+	2.17	8.58e-07	0.000134
organonitrogen compound biosynthetic process (GO:1901566)	372	89	43.21	+	2.06	4.84e-09	1.4e-06
protein-containing complex subunit organization (GO:0043933)	283	60	32.87	+	1.83	4.57e-05	0.00404
cellular component assembly (GO:0022607)	440	81	51.11	+	1.58	0.000215	0.0104
cellular component biogenesis (GO:0044085)	530	96	61.56	+	1.56	8.34e-05	0.00564
organonitrogen compound metabolic process (GO:1901564)	1332	218	154.71	+	1.41	8.46e-07	0.000143
cellular protein metabolic process (GO:0044267)	998	161	115.92	+	1.39	6.75e-05	0.00508
protein metabolic process (GO:0019538)	1104	172	128.23	+	1.34	0.000197	0.00975
cellular nitrogen compound metabolic process (GO:0034641)	1391	204	161.56	+	1.26	0.000972	0.0372
cellular metabolic process (GO:0044237)	2467	355	286.54	+	1.24	1.48e-05	0.00143
metabolic process (GO:0008152)	2597	365	301.64	+	1.21	6.93e-05	0.00502
nitrogen compound metabolic process (GO:0006807)	2280	319	264.82	+	1.2	0.000431	0.0186
organic substance metabolic process (GO:0071704)	2489	345	289.09	+	1.19	0.000415	0.0183
primary metabolic process (GO:0044238)	2396	331	278.29	+	1.19	0.000697	0.0283
regulation of biological process (GO:0050789)	1943	179	225.68	-	0.79	0.000819	0.0326
biological regulation (GO:0065007)	2192	197	254.6	-	0.77	6.2e-05	0.00484
signaling (GO:0023052)	911	74	105.81	-	0.7	0.00145	0.0498
cell differentiation (GO:0030154)	382	21	44.37	-	0.47	0.00023	0.0106
cellular developmental process (GO:0048869)	421	23	48.9	-	0.47	9.02e-05	0.00482
developmental process (GO:0032502)	584	29	67.83	-	0.43	2.63e-07	5.94e-05
anatomical structure development (GO:0048856)	519	25	60.28	-	0.41	7.7e-07	0.000142
system development (GO:0048731)	365	16	42.39	-	0.38	1.09e-05	0.00116
multicellular organism development (GO:0007275)	416	18	48.32	-	0.37	1.76e-06	0.000256
multicellular organismal process (GO:0032501)	520	20	60.4	-	0.33	7.12e-09	1.81e-06
animal organ development (GO:0048513)	153	5	17.77	-	0.28	0.00138	0.0493
second-messenger-mediated signaling (GO:0019932)	104	2	12.08	-	0.17	0.00121	0.0438

## Sheet: Tumors_TKN-vs-BR_Down
Analysis Type:	PANTHER Overrepresentation Test (Released 20200407)
Annotation Version and Release Date:	PANTHER version 15.0 Released 2020-02-14
Analyzed List:	downGeneList.txt (Homo sapiens)
Reference List:	allGeneList_tumors.txt (Homo sapiens)
Test Type:	FISHER
Correction:	FDR
PANTHER GO-Slim Biological Process	allGeneList_tumors.txt - REFLIST (9419)	downGeneList.txt (264)	downGeneList.txt (expected)	downGeneList.txt (over/under)	downGeneList.txt (fold Enrichment)	downGeneList.txt (raw P-value)	downGeneList.txt (FDR)
cytoplasmic translation (GO:0002181)	26	7	0.73	+	9.61	2.41e-05	0.00698
translational elongation (GO:0006414)	143	16	4.01	+	3.99	6.58e-06	0.00668
translation (GO:0006412)	143	16	4.01	+	3.99	6.58e-06	0.00446
peptide biosynthetic process (GO:0043043)	145	16	4.06	+	3.94	7.74e-06	0.00393
amide biosynthetic process (GO:0043604)	159	16	4.46	+	3.59	2.22e-05	0.00752
peptide metabolic process (GO:0006518)	177	17	4.96	+	3.43	2.15e-05	0.00871
cellular amide metabolic process (GO:0043603)	214	20	6	+	3.33	5.82e-06	0.0118

## Sheet: Tumors_TKN-vs-BR_Up
Analysis Type:	PANTHER Overrepresentation Test (Released 20200407)
Annotation Version and Release Date:	PANTHER version 15.0 Released 2020-02-14
Analyzed List:	upGeneList.txt (Homo sapiens)
Reference List:	allGeneList_tumors.txt (Homo sapiens)
Test Type:	FISHER
Correction:	FDR
PANTHER GO-Slim Biological Process	allGeneList_tumors.txt - REFLIST (9419)	upGeneList.txt (405)	upGeneList.txt (expected)	upGeneList.txt (over/under)	upGeneList.txt (fold Enrichment)	upGeneList.txt (raw P-value)	upGeneList.txt (FDR)
cytoplasmic microtubule organization (GO:0031122)	21	8	0.9	+	8.86	1.56e-05	0.0316

## Sheet: Tumors_WPP-vs-TKN_Down
Analysis Type:	PANTHER Overrepresentation Test (Released 20200407)
Annotation Version and Release Date:	PANTHER version 15.0 Released 2020-02-14
Analyzed List:	downGeneList.txt (Homo sapiens)
Reference List:	allGeneList_tumors.txt (Homo sapiens)
Test Type:	FISHER
Correction:	FDR
PANTHER GO-Slim Biological Process	allGeneList_tumors.txt - REFLIST (9419)	downGeneList.txt (306)	downGeneList.txt (expected)	downGeneList.txt (over/under)	downGeneList.txt (fold Enrichment)	downGeneList.txt (raw P-value)	downGeneList.txt (FDR)
positive regulation of RNA polymerase II transcriptional preinitiation complex assembly (GO:0045899)	4	3	0.13	+	23.09	0.000983	0.0249
positive regulation of DNA-templated transcription, initiation (GO:2000144)	5	3	0.16	+	18.47	0.00154	0.0325
positive regulation of transcription initiation from RNA polymerase II promoter (GO:0060261)	5	3	0.16	+	18.47	0.00154	0.0321
regulation of RNA polymerase II transcriptional preinitiation complex assembly (GO:0045898)	5	3	0.16	+	18.47	0.00154	0.0318
regulation of DNA-templated transcription, initiation (GO:2000142)	6	3	0.19	+	15.39	0.00225	0.0444
regulation of transcription initiation from RNA polymerase II promoter (GO:0060260)	6	3	0.19	+	15.39	0.00225	0.0439
purine nucleoside triphosphate biosynthetic process (GO:0009145)	18	8	0.58	+	13.68	8.36e-07	0.000106
purine nucleoside triphosphate metabolic process (GO:0009144)	18	8	0.58	+	13.68	8.36e-07	9.98e-05
ATP biosynthetic process (GO:0006754)	18	8	0.58	+	13.68	8.36e-07	9.42e-05
ATP synthesis coupled proton transport (GO:0015986)	18	8	0.58	+	13.68	8.36e-07	8.93e-05
energy coupled proton transport, down electrochemical gradient (GO:0015985)	18	8	0.58	+	13.68	8.36e-07	8.48e-05
purine ribonucleoside triphosphate biosynthetic process (GO:0009206)	18	8	0.58	+	13.68	8.36e-07	8.08e-05
purine ribonucleoside triphosphate metabolic process (GO:0009205)	18	8	0.58	+	13.68	8.36e-07	7.71e-05
ribonucleoside triphosphate metabolic process (GO:0009199)	20	8	0.65	+	12.31	1.57e-06	0.00011
RNA polymerase II preinitiation complex assembly (GO:0051123)	10	4	0.32	+	12.31	0.000749	0.0217
ribonucleoside triphosphate biosynthetic process (GO:0009201)	20	8	0.65	+	12.31	1.57e-06	0.000106
oxidative phosphorylation (GO:0006119)	13	5	0.42	+	11.84	0.000182	0.00712
cytoplasmic translation (GO:0002181)	26	10	0.84	+	11.84	1.01e-07	1.86e-05
respiratory electron transport chain (GO:0022904)	19	7	0.62	+	11.34	1.12e-05	0.000615
electron transport chain (GO:0022900)	19	7	0.62	+	11.34	1.12e-05	0.000599
nucleoside triphosphate biosynthetic process (GO:0009142)	23	8	0.75	+	10.71	3.68e-06	0.000233
proton transmembrane transport (GO:1902600)	23	8	0.75	+	10.71	3.68e-06	0.000226
nucleoside triphosphate metabolic process (GO:0009141)	26	9	0.84	+	10.65	9.23e-07	7.81e-05
ATP synthesis coupled electron transport (GO:0042773)	12	4	0.39	+	10.26	0.0013	0.0296
maturation of LSU-rRNA (GO:0000470)	21	7	0.68	+	10.26	1.91e-05	0.00097
transcription preinitiation complex assembly (GO:0070897)	14	4	0.45	+	8.79	0.00207	0.0417
ATP metabolic process (GO:0046034)	29	8	0.94	+	8.49	1.53e-05	0.000795
translational initiation (GO:0006413)	22	6	0.71	+	8.39	0.000194	0.00742
protein localization to endoplasmic reticulum (GO:0070972)	20	5	0.65	+	7.7	0.000944	0.0249
ribosomal large subunit biogenesis (GO:0042273)	37	9	1.2	+	7.49	1.06e-05	0.000599
purine ribonucleotide biosynthetic process (GO:0009152)	41	9	1.33	+	6.76	2.16e-05	0.00107
purine nucleotide biosynthetic process (GO:0006164)	44	9	1.43	+	6.3	3.52e-05	0.0017
ribonucleotide biosynthetic process (GO:0009260)	44	9	1.43	+	6.3	3.52e-05	0.00166
ribose phosphate biosynthetic process (GO:0046390)	46	9	1.49	+	6.02	4.78e-05	0.00216
purine-containing compound biosynthetic process (GO:0072522)	47	9	1.53	+	5.89	5.54e-05	0.00239
cellular respiration (GO:0045333)	40	7	1.3	+	5.39	0.000608	0.0187
translational elongation (GO:0006414)	143	24	4.65	+	5.17	3.92e-10	3.97e-07
translation (GO:0006412)	143	24	4.65	+	5.17	3.92e-10	2.65e-07
peptide biosynthetic process (GO:0043043)	145	24	4.71	+	5.09	5.03e-10	2.55e-07
energy derivation by oxidation of organic compounds (GO:0015980)	43	7	1.4	+	5.01	0.000891	0.0248
amide biosynthetic process (GO:0043604)	159	25	5.17	+	4.84	5.63e-10	2.29e-07
nucleotide biosynthetic process (GO:0009165)	61	9	1.98	+	4.54	0.000323	0.0113
peptide metabolic process (GO:0006518)	177	26	5.75	+	4.52	9.3e-10	3.15e-07
nucleoside phosphate biosynthetic process (GO:1901293)	62	9	2.01	+	4.47	0.00036	0.0124
ribosome biogenesis (GO:0042254)	112	16	3.64	+	4.4	2.41e-06	0.000158
generation of precursor metabolites and energy (GO:0006091)	58	8	1.88	+	4.25	0.00103	0.0258
ribonucleoprotein complex assembly (GO:0022618)	58	8	1.88	+	4.25	0.00103	0.0255
ribonucleoprotein complex biogenesis (GO:0022613)	146	20	4.74	+	4.22	2.4e-07	4.06e-05
purine ribonucleotide metabolic process (GO:0009150)	67	9	2.18	+	4.13	0.000601	0.0188
rRNA processing (GO:0006364)	82	11	2.66	+	4.13	0.000153	0.00609
drug metabolic process (GO:0017144)	77	10	2.5	+	4	0.000384	0.013
ribonucleoprotein complex subunit organization (GO:0071826)	62	8	2.01	+	3.97	0.00152	0.0324
purine nucleotide metabolic process (GO:0006163)	70	9	2.27	+	3.96	0.000799	0.0228
rRNA metabolic process (GO:0016072)	86	11	2.79	+	3.94	0.000223	0.00824
ribonucleotide metabolic process (GO:0009259)	71	9	2.31	+	3.9	0.000876	0.0247
cellular amide metabolic process (GO:0043603)	214	27	6.95	+	3.88	8.58e-09	2.18e-06
ribose phosphate metabolic process (GO:0019693)	74	9	2.4	+	3.74	0.00114	0.0273
purine-containing compound metabolic process (GO:0072521)	77	9	2.5	+	3.6	0.00147	0.0322
cellular protein-containing complex assembly (GO:0034622)	209	23	6.79	+	3.39	1.03e-06	8.37e-05
nucleoside phosphate metabolic process (GO:0006753)	93	10	3.02	+	3.31	0.00146	0.0322
organonitrogen compound biosynthetic process (GO:1901566)	372	40	12.09	+	3.31	1.47e-10	2.99e-07
protein-containing complex assembly (GO:0065003)	226	24	7.34	+	3.27	1.07e-06	8.35e-05
proteasomal protein catabolic process (GO:0010498)	134	13	4.35	+	2.99	0.000728	0.0214
carbohydrate derivative biosynthetic process (GO:1901137)	148	14	4.81	+	2.91	0.000579	0.0187
proteasome-mediated ubiquitin-dependent protein catabolic process (GO:0043161)	128	12	4.16	+	2.89	0.00152	0.0327
ncRNA processing (GO:0034470)	141	13	4.58	+	2.84	0.00112	0.0272
protein-containing complex subunit organization (GO:0043933)	283	24	9.19	+	2.61	3.61e-05	0.00166
ncRNA metabolic process (GO:0034660)	179	15	5.82	+	2.58	0.00118	0.0273
modification-dependent protein catabolic process (GO:0019941)	183	15	5.95	+	2.52	0.00145	0.0324
modification-dependent macromolecule catabolic process (GO:0043632)	187	15	6.08	+	2.47	0.00177	0.036
proteolysis involved in cellular protein catabolic process (GO:0051603)	203	16	6.59	+	2.43	0.00233	0.0447
cellular protein catabolic process (GO:0044257)	204	16	6.63	+	2.41	0.00238	0.0451
cellular component biogenesis (GO:0044085)	530	40	17.22	+	2.32	1.46e-06	0.000106
cellular component assembly (GO:0022607)	440	28	14.29	+	1.96	0.000975	0.0251
cellular protein metabolic process (GO:0044267)	998	59	32.42	+	1.82	9.23e-06	0.000551
protein metabolic process (GO:0019538)	1104	61	35.87	+	1.7	4.89e-05	0.00216
organonitrogen compound metabolic process (GO:1901564)	1332	73	43.27	+	1.69	9.75e-06	0.000566
cellular nitrogen compound metabolic process (GO:0034641)	1391	69	45.19	+	1.53	0.000434	0.0144
cellular biosynthetic process (GO:0044249)	1119	55	36.35	+	1.51	0.00231	0.0446
cellular metabolic process (GO:0044237)	2467	110	80.15	+	1.37	0.000218	0.00821
nitrogen compound metabolic process (GO:0006807)	2280	101	74.07	+	1.36	0.000699	0.0209
primary metabolic process (GO:0044238)	2396	103	77.84	+	1.32	0.00173	0.0354
metabolic process (GO:0008152)	2597	111	84.37	+	1.32	0.00116	0.0274
regulation of cellular metabolic process (GO:0031323)	925	14	30.05	-	0.47	0.00112	0.0275
regulation of metabolic process (GO:0019222)	1006	15	32.68	-	0.46	0.000592	0.0188
regulation of macromolecule metabolic process (GO:0060255)	958	14	31.12	-	0.45	0.000644	0.0195
regulation of nitrogen compound metabolic process (GO:0051171)	897	13	29.14	-	0.45	0.000924	0.025
regulation of primary metabolic process (GO:0080090)	904	13	29.37	-	0.44	0.00094	0.0251
biological regulation (GO:0065007)	2192	31	71.21	-	0.44	6.62e-09	1.92e-06
regulation of cellular process (GO:0050794)	1835	25	59.61	-	0.42	7.97e-08	1.62e-05
regulation of biological process (GO:0050789)	1943	26	63.12	-	0.41	1.83e-08	4.12e-06
regulation of RNA metabolic process (GO:0051252)	632	7	20.53	-	0.34	0.00091	0.025
regulation of gene expression (GO:0010468)	726	8	23.59	-	0.34	0.000259	0.00938
response to stimulus (GO:0050896)	1215	13	39.47	-	0.33	7.03e-07	0.00011
regulation of nucleobase-containing compound metabolic process (GO:0019219)	659	7	21.41	-	0.33	0.000485	0.0159
cellular response to stimulus (GO:0051716)	1085	11	35.25	-	0.31	1.39e-06	0.000104
multicellular organismal process (GO:0032501)	520	5	16.89	-	0.3	0.00118	0.0275
signaling (GO:0023052)	911	7	29.6	-	0.24	7.45e-07	0.000108
cell communication (GO:0007154)	912	7	29.63	-	0.24	7.47e-07	0.000101
multicellular organism development (GO:0007275)	416	3	13.51	-	0.22	0.00138	0.0312
cellular developmental process (GO:0048869)	421	3	13.68	-	0.22	0.000961	0.025
signal transduction (GO:0007165)	845	6	27.45	-	0.22	9.2e-07	8.12e-05
developmental process (GO:0032502)	584	4	18.97	-	0.21	7.15e-05	0.00302
anatomical structure development (GO:0048856)	519	3	16.86	-	0.18	8.13e-05	0.00337
intracellular signal transduction (GO:0035556)	454	2	14.75	-	0.14	8.6e-05	0.00349
negative regulation of gene expression (GO:0010629)	209	0	6.79	-	< 0.01	0.00208	0.0413
anatomical structure morphogenesis (GO:0009653)	269	0	8.74	-	< 0.01	0.000277	0.00985

## Sheet: Tumors_WPP-vs-TKN_Up
Analysis Type:	PANTHER Overrepresentation Test (Released 20200407)
Annotation Version and Release Date:	PANTHER version 15.0 Released 2020-02-14
Analyzed List:	upGeneList.txt (Homo sapiens)
Reference List:	allGeneList_tumors.txt (Homo sapiens)
Test Type:	FISHER
Correction:	FDR
PANTHER GO-Slim Biological Process	allGeneList_tumors.txt - REFLIST (9419)	upGeneList.txt (584)	upGeneList.txt (expected)	upGeneList.txt (over/under)	upGeneList.txt (fold Enrichment)	upGeneList.txt (raw P-value)	upGeneList.txt (FDR)
chromatin organization (GO:0006325)	126	23	7.81	+	2.94	1.63e-05	0.00174
negative regulation of biosynthetic process (GO:0009890)	169	25	10.48	+	2.39	0.000255	0.0162
negative regulation of cellular biosynthetic process (GO:0031327)	169	25	10.48	+	2.39	0.000255	0.0157
negative regulation of nucleic acid-templated transcription (GO:1903507)	144	21	8.93	+	2.35	0.000645	0.0285
negative regulation of transcription, DNA-templated (GO:0045892)	144	21	8.93	+	2.35	0.000645	0.0279
negative regulation of RNA biosynthetic process (GO:1902679)	144	21	8.93	+	2.35	0.000645	0.0273
negative regulation of macromolecule biosynthetic process (GO:0010558)	165	24	10.23	+	2.35	0.000393	0.02
negative regulation of cellular macromolecule biosynthetic process (GO:2000113)	165	24	10.23	+	2.35	0.000393	0.0195
positive regulation of RNA metabolic process (GO:0051254)	245	34	15.19	+	2.24	4.15e-05	0.00337
negative regulation of gene expression (GO:0010629)	209	29	12.96	+	2.24	0.000195	0.0132
negative regulation of cellular metabolic process (GO:0031324)	240	33	14.88	+	2.22	6.26e-05	0.00454
positive regulation of nucleobase-containing compound metabolic process (GO:0045935)	257	35	15.93	+	2.2	6.02e-05	0.00452
negative regulation of metabolic process (GO:0009892)	287	38	17.79	+	2.14	3.46e-05	0.00305
positive regulation of nucleic acid-templated transcription (GO:1903508)	235	31	14.57	+	2.13	0.00026	0.0155
positive regulation of transcription, DNA-templated (GO:0045893)	235	31	14.57	+	2.13	0.00026	0.0151
positive regulation of RNA biosynthetic process (GO:1902680)	235	31	14.57	+	2.13	0.00026	0.0147
negative regulation of nitrogen compound metabolic process (GO:0051172)	226	29	14.01	+	2.07	0.000573	0.0258
positive regulation of macromolecule biosynthetic process (GO:0010557)	253	32	15.69	+	2.04	0.000428	0.0207
positive regulation of gene expression (GO:0010628)	262	33	16.24	+	2.03	0.000331	0.0172
negative regulation of macromolecule metabolic process (GO:0010605)	272	34	16.86	+	2.02	0.000272	0.0149
positive regulation of cellular biosynthetic process (GO:0031328)	258	32	16	+	2	0.000495	0.0234
positive regulation of biosynthetic process (GO:0009891)	259	32	16.06	+	1.99	0.000512	0.0236
regulation of nucleobase-containing compound metabolic process (GO:0019219)	659	74	40.86	+	1.81	2.46e-06	0.00249
regulation of transcription by RNA polymerase II (GO:0006357)	410	46	25.42	+	1.81	0.000297	0.0159
transcription by RNA polymerase II (GO:0006366)	428	48	26.54	+	1.81	0.000183	0.0128
regulation of transcription, DNA-templated (GO:0006355)	581	65	36.02	+	1.8	1.2e-05	0.00187
regulation of nucleic acid-templated transcription (GO:1903506)	581	65	36.02	+	1.8	1.2e-05	0.00174
regulation of RNA biosynthetic process (GO:2001141)	581	65	36.02	+	1.8	1.2e-05	0.00162
nucleic acid-templated transcription (GO:0097659)	608	68	37.7	+	1.8	8.06e-06	0.00164
transcription, DNA-templated (GO:0006351)	608	68	37.7	+	1.8	8.06e-06	0.00149
regulation of cellular macromolecule biosynthetic process (GO:2000112)	637	71	39.5	+	1.8	5.7e-06	0.00231
regulation of cellular biosynthetic process (GO:0031326)	647	72	40.12	+	1.79	4.56e-06	0.00309
RNA biosynthetic process (GO:0032774)	612	68	37.95	+	1.79	8.86e-06	0.0015
regulation of macromolecule biosynthetic process (GO:0010556)	639	71	39.62	+	1.79	5.92e-06	0.002
regulation of biosynthetic process (GO:0009889)	650	72	40.3	+	1.79	4.94e-06	0.00251
regulation of RNA metabolic process (GO:0051252)	632	70	39.19	+	1.79	7.87e-06	0.002
regulation of gene expression (GO:0010468)	726	80	45.01	+	1.78	2.05e-06	0.00416
RNA metabolic process (GO:0016070)	941	95	58.34	+	1.63	6.45e-06	0.00187
regulation of primary metabolic process (GO:0080090)	904	91	56.05	+	1.62	1.2e-05	0.00153
regulation of cellular metabolic process (GO:0031323)	925	93	57.35	+	1.62	7.96e-06	0.0018
cellular macromolecule biosynthetic process (GO:0034645)	911	91	56.48	+	1.61	1.33e-05	0.00159
macromolecule biosynthetic process (GO:0009059)	914	91	56.67	+	1.61	1.83e-05	0.00186
regulation of nitrogen compound metabolic process (GO:0051171)	897	89	55.62	+	1.6	2.2e-05	0.00203
regulation of metabolic process (GO:0019222)	1006	98	62.37	+	1.57	1.62e-05	0.00183
regulation of macromolecule metabolic process (GO:0060255)	958	93	59.4	+	1.57	3.67e-05	0.0031
gene expression (GO:0010467)	1104	105	68.45	+	1.53	1.93e-05	0.00187
nucleobase-containing compound biosynthetic process (GO:0034654)	747	70	46.32	+	1.51	0.00102	0.0413
cellular nitrogen compound biosynthetic process (GO:0044271)	918	86	56.92	+	1.51	0.000213	0.0139
nucleic acid metabolic process (GO:0090304)	1101	103	68.26	+	1.51	4.5e-05	0.00351
nucleobase-containing compound metabolic process (GO:0006139)	1218	105	75.52	+	1.39	0.000819	0.0339
